# Supplementary material for: New Dinuclear Macrocyclic Copper(II) Complexes as Potentially Fluorescent and Magnetic Materials
Source: MDPI journal article supplement (doi:10.3390/ijms24033017), 2023-02-03
Supplement: s1 [file s1]

# New dinuclear macrocyclic copper(II) complexes as potentially fluorescent and magnetic materials

## *Table of contents:*

**Figure S1.** IR spectrum of **K1**.

**Figure S2.** IR spectrum of **K2**.

**Figure S3.** a) TG-DTA traces of **K1** and b) **K2**.

**Figure S4.** a) TG-DTA traces of **K1** and b) IR spectra decomposition products.

**Figure S5.** a) TG-DTA traces of **K2** and b) IR spectra decomposition products.

**Figure S6.** XRD of the thermal analysis residue of **K1**.

**Figure S7.** XRD of the thermal analysis residue of **K2**.

**Figure S8.** Powder EPR spectra recorded for **K1** (A) and **K2** (B) at 77 K.

**Figure S9.** Powder EPR spectra recorded for **K1** and **K2** at 350 K.

**Figure S10.** SEM/EDX images of **K1** mapping scanning size 300  $\mu\text{m}$ .

**Figure S11.** SEM/EDX images of **K2** mapping scanning size 300  $\mu\text{m}$ .

**Figure S12.** AFM of **K1**/Si, thermal deposition, scan size 5  $\mu\text{m}$ ,  $R_a=4.02$  nm,  $R_q=5.36$  nm.

**Figure 13.** IR DRIFT of **K1**/Si and **K2**/Si materials- thermal vapour deposition.

**Table S1.** The theoretical values of the  $J(\text{Cu}_1\text{-Cu}_2)$  magnetic coupling constants [ $\text{cm}^{-1}$ ], estimated within the broken-symmetry and spin-flip approach with B3LYP functional and def2-SVP/def2-QZVPP(Cu) basis set according to the three schemes: spin-projected (SP), spin-unprojected (SUP) and approximate spin-projected (AP).

**Table S2.** Relevant photophysical data of studied compounds:  $\lambda_{\text{em}}$ ,  $\lambda_{\text{ex}}$  [nm]  $B_p=8$ ;  $\lambda$ [nm] ( $\epsilon$  [ $\text{dm}^3 \text{mol}^{-1} \text{cm}^{-1}$ ]); Stoke shift [nm], [ $\text{cm}^{-1}$ ];  $Q$   $B_p=5$ .

**Table S3.** Fluorescence data of the thin materials **K1/Si** and **K2/Si** obtained by thermal vapour deposition.

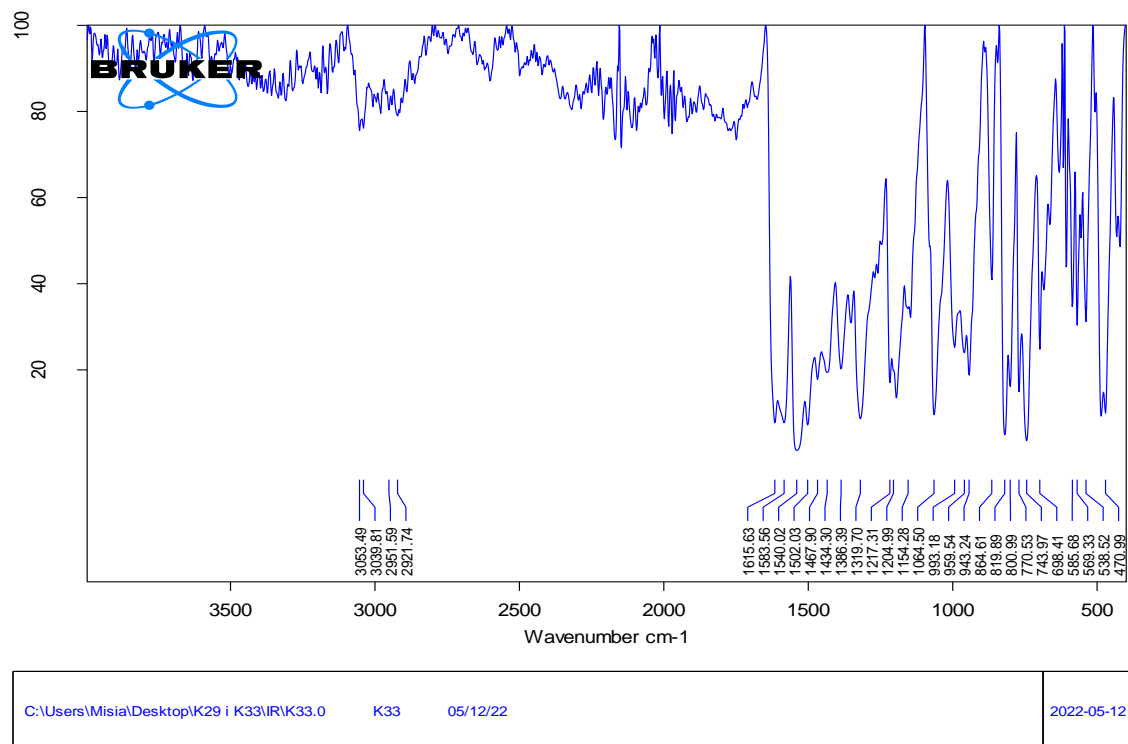

**Figure S1.** IR spectrum of **K1**.

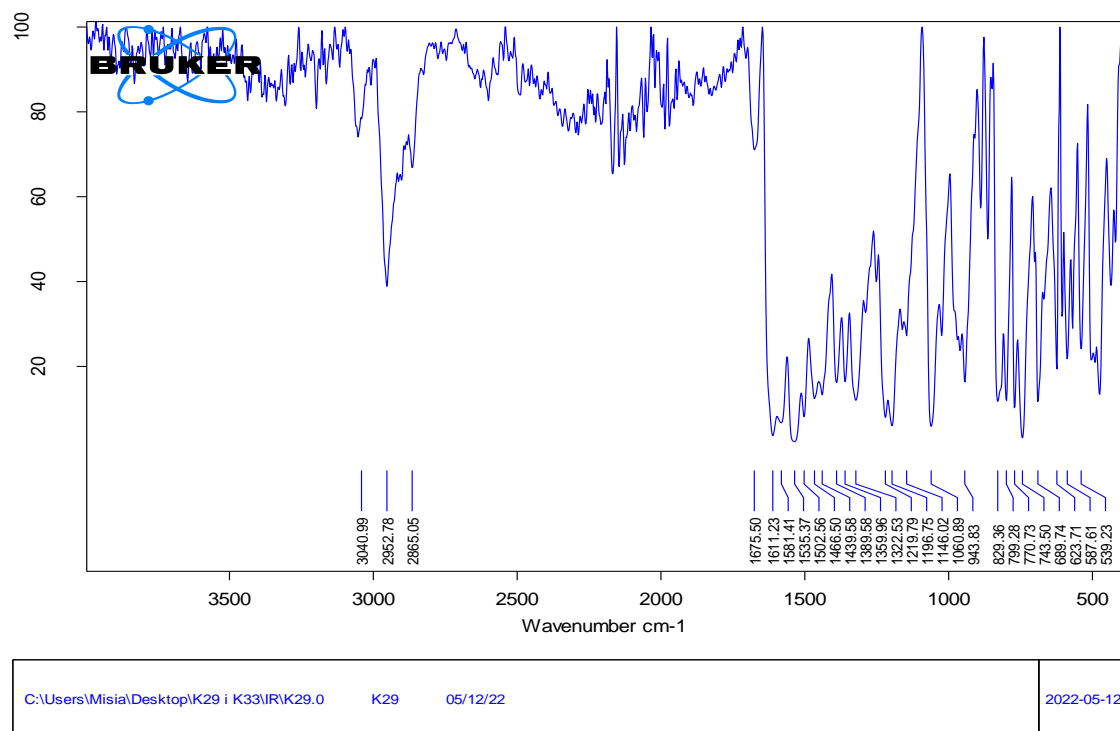

Page 1/1

Figure S2. IR spectrum of K2.

## Thermal analysis

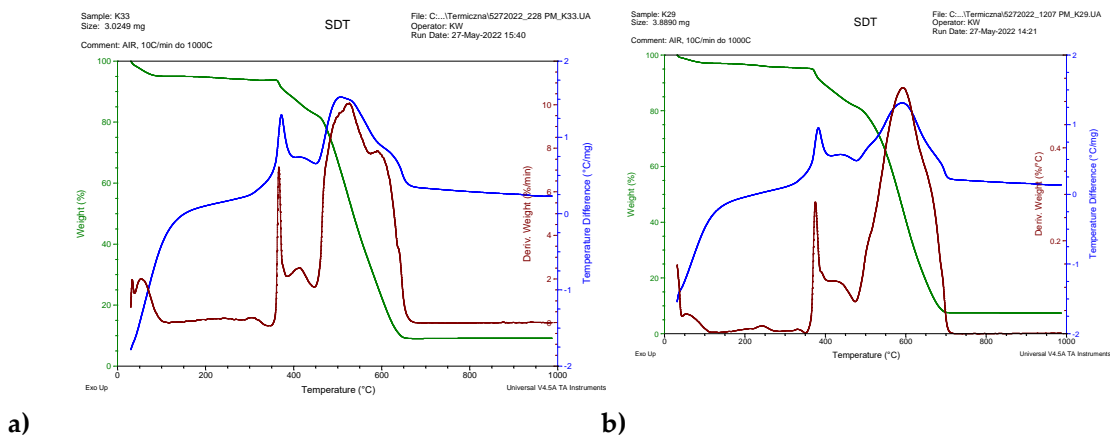

Figure S3. a) TG-DTA traces of K1 and b) K2.

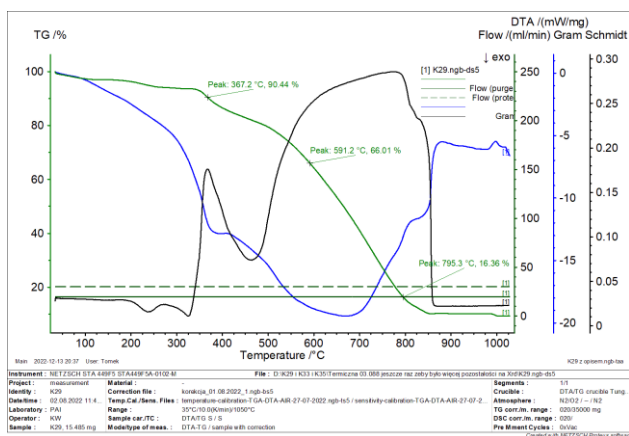

a)

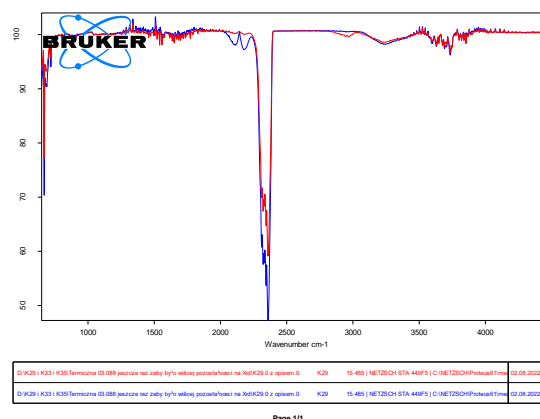

b)

Figure 4. a) TG-DTA traces of K1 and b) IR spectra decomposition product

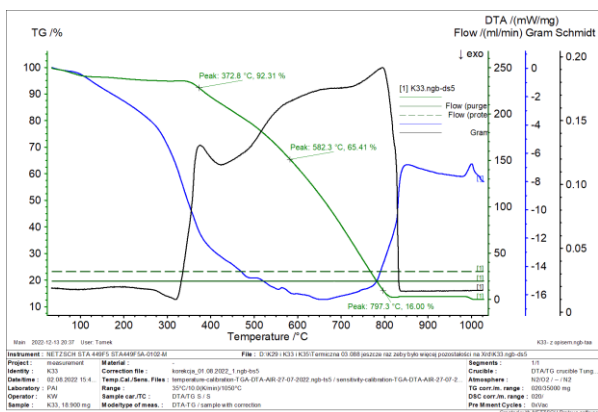

a)

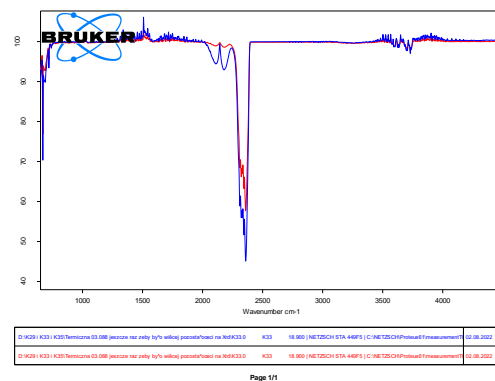

b)

Figure S5. a) TG-DTA traces of K2 and b) IR spectra decomposition products.

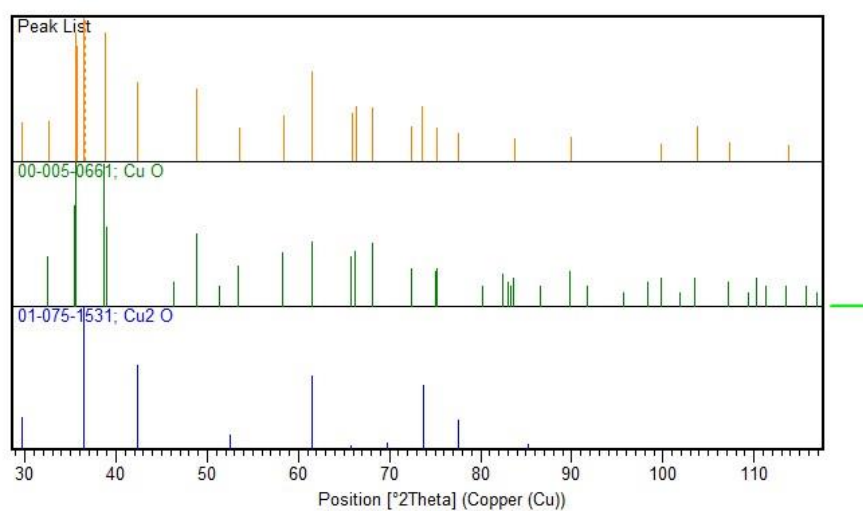

**Figure S6.** XRD of the thermal analysis residue of **K1**.

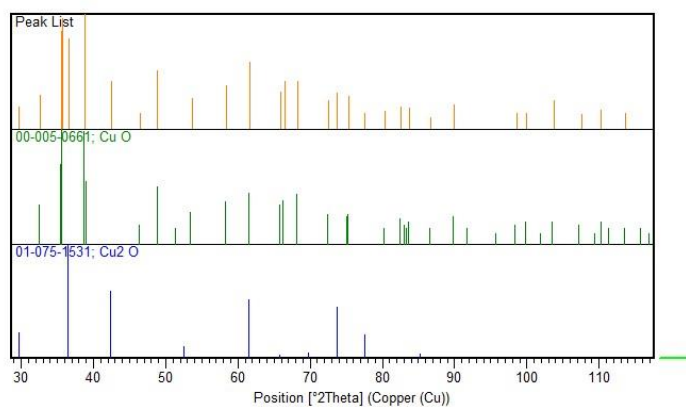

**Figure S7.** XRD of the thermal analysis residue of **K2**.

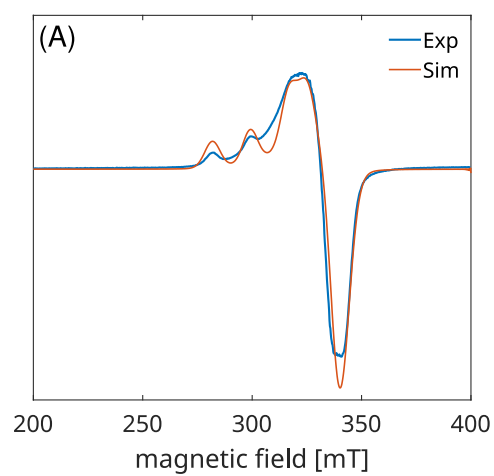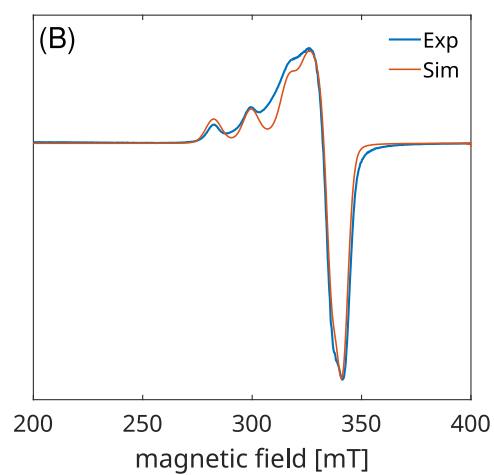

**Figure S8.** Powder EPR spectra recorded for **K1** (A) and **K2** (B) at 77 K.

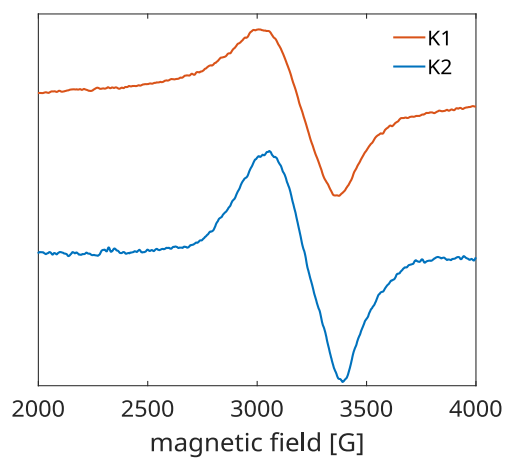

**Figure S9.** Powder EPR spectra recorded for **K1** and **K2** at 350 K.

**Table S1.** The theoretical values of the  $J(\text{Cu}_1\text{-Cu}_2)$  magnetic coupling constants [ $\text{cm}^{-1}$ ], estimated within the broken-symmetry and spin-flip approach with B3LYP functional and def2-SVP/def2-QZVPP(Cu) basis set according to the three schemes: spin-projected (SP), spin-unprojected (SUP) and approximate spin-projected (AP).

|                                                         | K1                          | K2                          |
|---------------------------------------------------------|-----------------------------|-----------------------------|
| <b>Broken Symmetry/B3LYP/def2-SVP+def2-QZVPP for Cu</b> |                             |                             |
| E(High-Spin)-E(BrokenSym)                               | 673.941 (antiferromagnetic) | 693.172 (antiferromagnetic) |
| J(SP)                                                   | -673.94                     | -693.17                     |
| J(SUP)                                                  | -336.97                     | -346.59                     |
| J(AP)                                                   | -632.18                     | -649.28                     |
| <b>Spin-Flip/B3LYP/def2-SVP+def2-QZVPP for Cu</b>       |                             |                             |
| E(High-Spin)-E(BrokenSym)                               | 674.353 (antiferromagnetic) | 693.295 (antiferromagnetic) |
| J(SP)                                                   | -674.35                     | -693.29                     |
| J(SUP)                                                  | -337.18                     | -346.65                     |
| J(AP)                                                   | -632.58                     | -649.42                     |

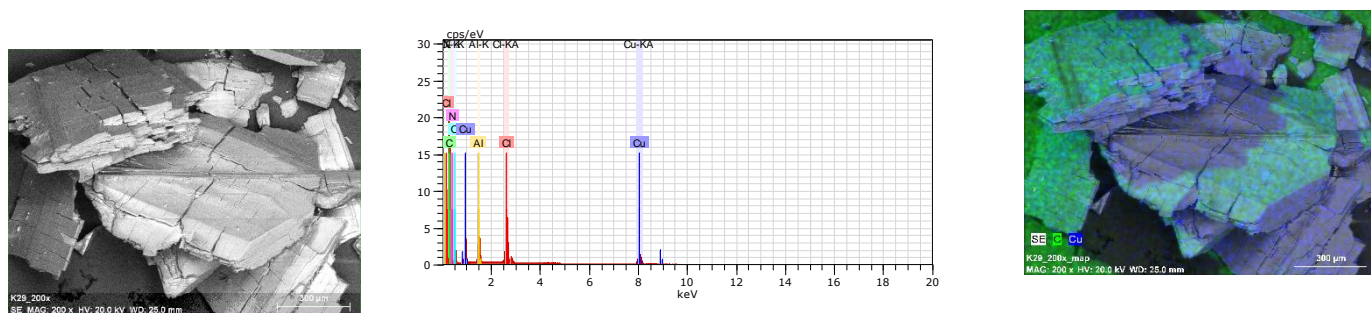

**Figure S10.** SEM/EDX images of **K1** mapping scanning size 300  $\mu\text{m}$ .

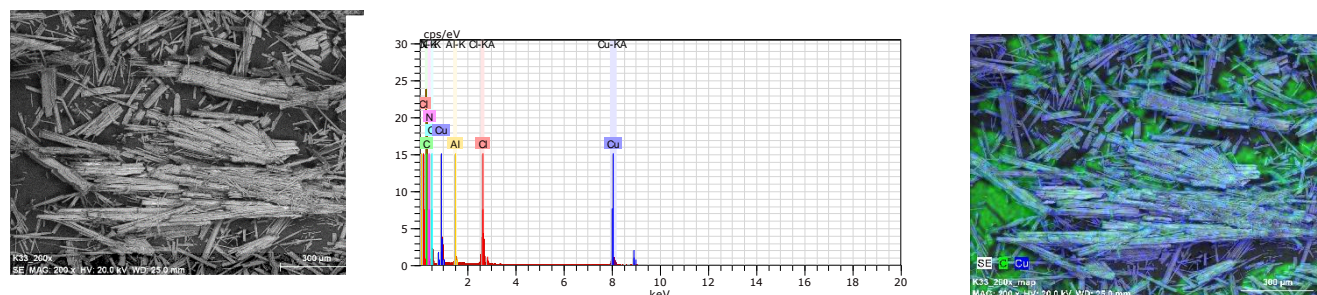

**Figure S11.** SEM/EDX images of **K2** mapping scanning size 300  $\mu\text{m}$ .

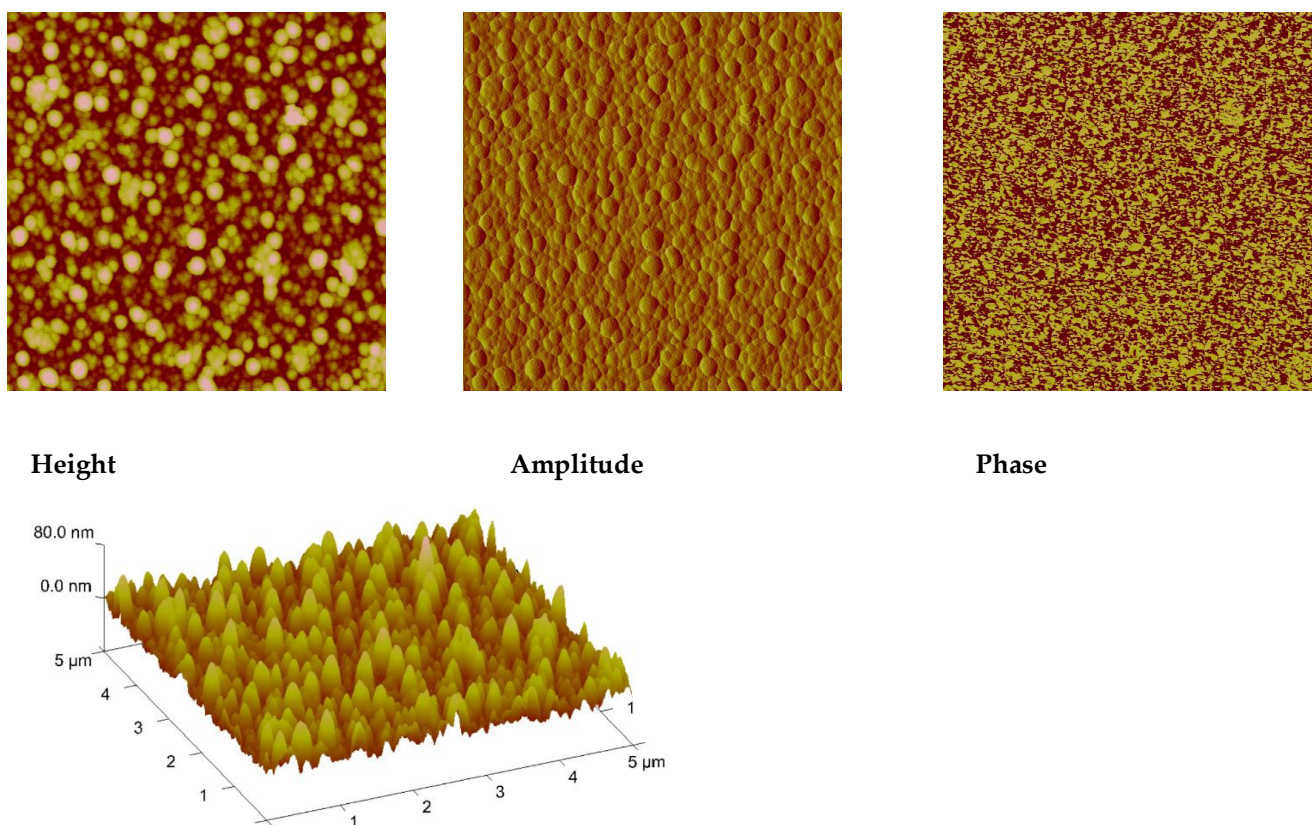

**Figure S12.** AFM of K1/Si, thermal deposition, scan size 5 μm,  $R_a=4.02$  nm,  $R_q=5.36$  nm.

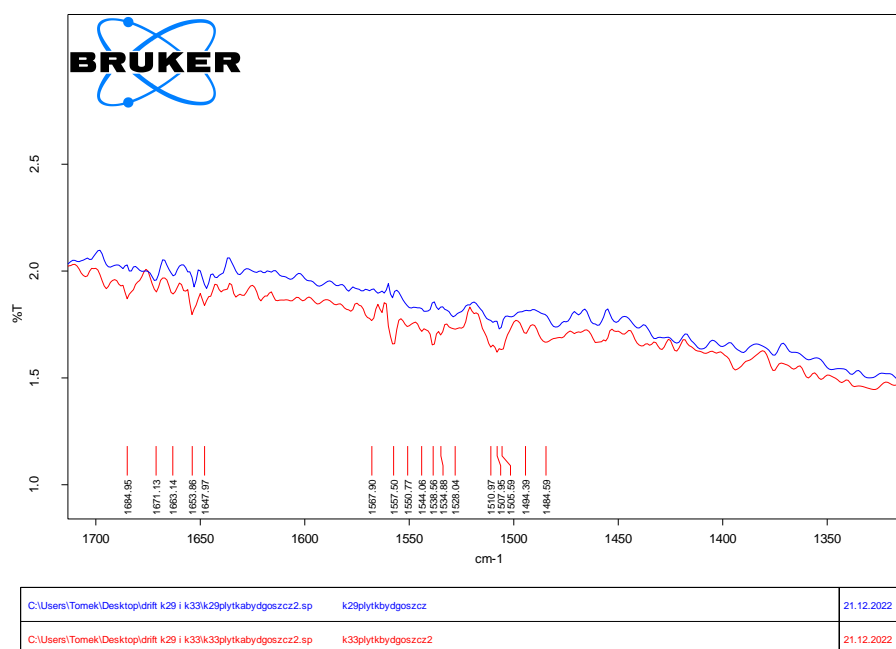

**Figure 13.** IR DRIFT of K1/Si and K2/Si materials- thermal vapour deposition.



**Table S2.** Relevant photophysical data of studied compounds:  $\tilde{\nu}_{em}, \tilde{\nu}_{ex}$  [nm] Bp=8;  $\lambda$ [nm] ( $\epsilon$  [dm<sup>3</sup> mol<sup>-1</sup> cm<sup>-1</sup>]); Stoke shift [nm], [cm<sup>-1</sup>]; Q Bp=5.

| Comp. | Solvent      | $\lambda_{ex}$<br>[nm] | $\lambda_{em}$<br>[nm] | Fluoresc.<br>Intensity<br>a. u. | $\lambda$ [nm] ( $\epsilon$ [dm <sup>3</sup> mol <sup>-1</sup> cm <sup>-1</sup> ]) | A                     | Q      | Stoke shift<br>[nm] [cm <sup>-1</sup> ] |         |
|-------|--------------|------------------------|------------------------|---------------------------------|------------------------------------------------------------------------------------|-----------------------|--------|-----------------------------------------|---------|
| K1    | acetone      |                        | 409                    | 1688725                         | 402 (39628)                                                                        | 0,128                 | 0,027  | 7                                       | 1428571 |
|       | methanol     |                        | 412                    | 1151660                         | 388 (43963); 324 (46440) sh; 274 (104025)                                          | 0,142; 0,150; 0,336   | 0,013  | 24                                      | 416667  |
|       | chloroform   | 350                    | 398                    | 201250                          | 408 (37461); 324 (40248) sh; 272 (114861)                                          | 0,121; 0,130; 0,371   | 0,0019 | 10                                      | 1000000 |
|       | DMSO         |                        | 424                    | 3021975                         | 660 (13313)<br>398 (44582); 290 (130960) sh                                        | 0,043<br>0,144; 0,423 | 0,017  | 26                                      | 384615  |
| K2    | acetone      |                        | 408                    | 1315030                         | 400 (40867)                                                                        | 0,132                 | 0,035  | 8                                       | 1250000 |
|       | methanol     |                        | 420                    | 438415                          | 388 (49845); 326 (50774) sh; 274 (123220)                                          | 0,161; 0,164; 0,398   | 0,011  | 32                                      | 312500  |
|       | chloroform   |                        | 392                    | 260640                          | 404 (43344); 328 (42724) sh; 272 (124458)                                          | 0,140; 0,138; 0,402   | 0,003  | 12                                      | 833333  |
|       | DMSO         | 350                    | 424                    | 1934125                         | 664 (12384)<br>394 (45201)                                                         | 0,040<br>0,146        | 0,021  | 30                                      | 333333  |
|       | acetonitrile |                        | 409                    | 982115                          | 392 (46749)                                                                        | 0,151                 | 0,038  | 17                                      | 588235  |

**Table S3.** Fluorescence data of the thin materials **K1**/Si and **K2**/Si – thermal vapour deposition.

| Comp.     | $\lambda_{\text{ex}}$ [nm] | $\lambda_{\text{em}}$ [nm] | Fluoresc. Intensity a. u. |
|-----------|----------------------------|----------------------------|---------------------------|
| <b>K2</b> | 250                        | 318                        | 11715                     |
|           |                            | 390                        | 13580                     |
|           |                            | 531                        | 7320                      |
|           | 320                        | 386                        | 27980                     |
|           |                            | 481                        | 15870                     |
|           |                            | 575                        | 5050                      |
|           |                            | 686                        | 9145                      |
| <b>K1</b> | 250                        | 326                        | 367045                    |
|           |                            | 377                        | 271315                    |
|           |                            | 472                        | 68955                     |
|           | 300                        | 376                        | 414115                    |
|           |                            | 472                        | 89570                     |
|           | 320                        | 372                        | 518885                    |
|           |                            | 474                        | 107320                    |
